# Supplementary material
Source: PubMed Central journal article supplement (PMC10580153)
Supplement: jamapediatr-e234505-s002.pdf [file jamapediatr-e234505-s002.pdf]

## Data Sharing Statement

Wee. Effectiveness of Monovalent mRNA Vaccines Against Omicron XBB Infection in Singaporean Children Younger Than 5 Years. *JAMA Pediatr.* Published October 16, 2023. doi:10.1001/jamapediatrics.2023.4505

### Data

**Data available:** No

### Additional Information

**Explanation for why data not available:** The databases with individual-level information used for this study are not publicly available due to personal data protection. Deidentified data can be made available for research, subject to approval by the Ministry of Health of Singapore. All inquiries should be sent to the corresponding author.
